# Supplementary material for: Chromosome-level genome assembly of bunching onion illuminates genome evolution and flavor formation in Allium crops
Source: PubMed Central journal article supplement (PMC9637129; doi:10.1038/s41467-022-34491-3), 2022-11-05
Supplement: 41467_2022_34491_MOESM1_ESM.pdf [file 41467_2022_34491_MOESM1_ESM.pdf]

**Chromosome-level genome assembly of bunching onion illuminates genome evolution and flavor formation in *Allium*  
crops**

Liao *et al.*

**Supplementary Table 1. Summary of the sequencing data for *A. fistulosum* genome assembly.**

| <b>Libraries</b>      | <b>Insert size</b> | <b>Total data (G)</b> | <b>Read length (bp)</b> | <b>Sequence coverage (X)</b> |
|-----------------------|--------------------|-----------------------|-------------------------|------------------------------|
| <b>Illumina reads</b> | 350bp              | 1389.89               | 150                     | 116.29                       |
| <b>PacBio reads</b>   | --                 | 1649.82               | --                      | 138.04                       |
| <b>Bionano</b>        | --                 | 1020.22               | --                      | 85.36                        |
| <b>HiC</b>            | --                 | 1136.41               | --                      | 95.08                        |
| <b>Total</b>          | --                 | 5196.34               | --                      | 434.77                       |

**Supplementary Table 2. Estimated genome statistics using *k-mer* analysis ( $k = 17$ ).**

| <b>Depth</b> | <b>Number of <i>k-mer</i></b> | <b>Genome size(M)</b> | <b>Revised genome size(M)</b> | <b>Heterozygous rate(%)</b> | <b>Repeat rate(%)</b> |
|--------------|-------------------------------|-----------------------|-------------------------------|-----------------------------|-----------------------|
| 87           | 1,041,421,564,963             | 11,970.36             | 11,951.73                     | 0.64                        | 89.89                 |

**Supplementary Table 3. Summary of the genome assemblies for *A. fistulosum*.**

|                     | <b>Pacbio+illumina+illumina-<br/>a-pilish+pacbio_polish</b> | <b>Pacbio+illumina+illumina-<br/>pilish+pacbio_polish+bionano</b> | <b>Pacbio+illumina+illumina-<br/>pilish+pacbio_polish+bionano+hic</b> |                |                 |
|---------------------|-------------------------------------------------------------|-------------------------------------------------------------------|-----------------------------------------------------------------------|----------------|-----------------|
|                     | <b>contig</b>                                               | <b>contig</b>                                                     | <b>scaffold</b>                                                       | <b>contig</b>  | <b>scaffold</b> |
| <b>Total_length</b> | 11,273,877,593                                              | 11,273,877,473                                                    | 11,293,432,26                                                         | 11,273,877,473 | 11,293,897,766  |
| <b>Total_number</b> | 7,619                                                       | 8,126                                                             | 7,352                                                                 | 8,278          | 2,855           |
| <b>Max_length</b>   | 87,932,624                                                  | 83,135,306                                                        | 90,340,743                                                            | 83,135,306     | 1,725,086,671   |
| <b>N50</b>          | 8,417,756                                                   | 7,415,081                                                         | 8,980,620                                                             | 7,345,229      | 1,386,005,700   |
| <b>N60</b>          | 6,233,651                                                   | 5,235,816                                                         | 6,549,398                                                             | 5,176,956      | 1,327,381,468   |
| <b>N70</b>          | 4,302,056                                                   | 3,625,928                                                         | 4,427,297                                                             | 3,565,919      | 1,223,795,258   |
| <b>N80</b>          | 4,302,056                                                   | 2,221,495                                                         | 2,740,631                                                             | 2,197,287      | 1,131,948,510   |
| <b>N90</b>          | 4,302,056                                                   | 1,061,145                                                         | 1,307,006                                                             | 1,055,328      | 1,109,041,757   |

**Supplementary Table 4. Summary of the genome characteristics of assemble using HiC data.**

| <b>Sequeues ID</b> | <b>Cluster number</b> | <b>Sequeues length</b> |
|--------------------|-----------------------|------------------------|
| <b>Chr1</b>        | 654                   | 1,641,299,136          |
| <b>Chr2</b>        | 713                   | 1,725,086,671          |
| <b>Chr3</b>        | 553                   | 1,223,795,258          |
| <b>Chr4</b>        | 555                   | 1,109,041,757          |
| <b>Chr5</b>        | 470                   | 1,131,948,510          |
| <b>Chr6</b>        | 603                   | 1,386,005,700          |
| <b>Chr7</b>        | 570                   | 1,603,727,048          |
| <b>Chr8</b>        | 545                   | 1,327,381,468          |

**Supplementary Table 5. Summary of Hi-C mapping.**

| <b>Class</b>    | <b>Scaffold number</b> | <b>Total length</b> | <b>Percentage of the genome</b> |
|-----------------|------------------------|---------------------|---------------------------------|
| <b>Placed</b>   | 8                      | 11,148,285,548      | 98.71%                          |
| <b>Unplaced</b> | 2,847                  | 145,612,218         | 1.29%                           |
| <b>Total</b>    | 2,855                  | 11,293,897,766      | 100%                            |

**Supplementary Table 6. Assembly assessments by BUSCO.**

|                                                                  | <b>C</b> | <b>S</b> | <b>D</b> | <b>F</b> | <b>M</b> |
|------------------------------------------------------------------|----------|----------|----------|----------|----------|
| <b>Pacbio+illumina+illumina-pilish+pacbio_polish</b>             | 91.90%   | 84.00%   | 7.90%    | 2.30%    | 5.80%    |
| <b>Pacbio+illumina+illumina-pilish+pacbio_polish+bionano</b>     | 91.70%   | 84.00%   | 7.70%    | 2.50%    | 5.80%    |
| <b>Pacbio+illumina+illumina-pilish+pacbio_polish+bionano+hic</b> | 91.00%   | 88.00%   | 3.00%    | 2.90%    | 6.10%    |
| <b>Annotated_genes</b>                                           | 93.80%   | 84.10%   | 9.70%    | 3.20%    | 3.00%    |

**#C: Complete Single-Copy BUSCOs; S : Complete and single-copy BUSCOs; D: Complete Duplicated BUSCOs; F: Fragmented BUSCOs; M: Missing BUSCOs; n: Total BUSCO groups searched**

**Supplementary Table 7. Assembly assessments using GEGMA.**

| <b>cies</b>                                                      | <b>Complete</b> |                      | <b>Complete + Partial</b> |                      |
|------------------------------------------------------------------|-----------------|----------------------|---------------------------|----------------------|
|                                                                  | <b># Prots</b>  | <b>%Completeness</b> | <b># Prots</b>            | <b>%Completeness</b> |
| <b>Pacbio+illumina+illumina-pilish+pacbio_polish</b>             | 221             | 89.11                | 232                       | 93.55                |
| <b>Pacbio+illumina+illumina-pilish+pacbio_polish+bionano</b>     | 220             | 88.71                | 231                       | 93.15                |
| <b>Pacbio+illumina+illumina-pilish+pacbio_polish+bionano+hic</b> | 222             | 89.52                | 234                       | 94.35                |



**Supplementary Table 8. Assembly assessments by Illumina read mapping.**

| <b>Version</b>                                                   | <b>Mapping rate (%)</b> | <b>Average sequencing depth</b> | <b>Coverage (%)</b> | <b>Coverage at least 4X (%)</b> | <b>Coverage at least 10X (%)</b> | <b>Coverage at least 20X (%)</b> | <b>SNP percentage (%)</b> | <b>Heterozygosis SNP (%)</b> | <b>Homology SNP (%)</b> |
|------------------------------------------------------------------|-------------------------|---------------------------------|---------------------|---------------------------------|----------------------------------|----------------------------------|---------------------------|------------------------------|-------------------------|
| <b>Pacbio+illumina+illumina-pilish+pacbio_polish</b>             | 99.65                   | 95.48                           | 99.34               | 99.26                           | 99.17                            | 99.06                            | 0.2222                    | 0.2213                       | 0.0009                  |
| <b>Pacbio+illumina+illumina-pilish+pacbio_polish+bionano</b>     | 99.65                   | 95.48                           | 99.34               | 99.26                           | 99.17                            | 99.06                            | 0.1912                    | 0.190571                     | 0.0629                  |
| <b>Pacbio+illumina+illumina-pilish+pacbio_polish+bionano+hic</b> | 99.65                   | 95.09                           | 99.34               | 99.25                           | 99.17                            | 99.06                            | 0.0064                    | 0.0063                       | 0.0001                  |

**Supplementary Table 9. Summary of repeated sequence identifications.**

| Type         | Repeat size (bp)     | Percentage of genome (%) |
|--------------|----------------------|--------------------------|
| TRF          | 540,922,313          | 4.79                     |
| Repeatmasker | 7,409,524,033        | 65.61                    |
| Proteinmask  | 1,932,359,143        | 17.11                    |
| <b>Total</b> | <b>7,884,598,942</b> | <b>69.81</b>             |

**Supplementary Table 10. Summary of repeated sequence annotations.**

|                | <b><i>De novo</i>+Rebase<br/>length(bp)</b> | <b>Percentgagge of<br/>genome (%)</b> | <b>TE proteins<br/>length(bp)</b> | <b>Percentgagge of<br/>genome (%)</b> | <b>Combined TEs<br/>length(bp)</b> | <b>Percentgagge of<br/>genome (%)</b> |
|----------------|---------------------------------------------|---------------------------------------|-----------------------------------|---------------------------------------|------------------------------------|---------------------------------------|
| <b>DNA</b>     | 333,089,856                                 | 3                                     | 109,476,349                       | 1                                     | 414,256,264                        | 4                                     |
| <b>LINE</b>    | 122,505,505                                 | 1                                     | 142,173,362                       | 1                                     | 235,142,630                        | 2                                     |
| <b>SINE</b>    | 715,356                                     | 0                                     | 0                                 | 0                                     | 715,356                            | 0                                     |
| <b>LTR</b>     | 6,830,517,902                               | 60                                    | 1,684,737,702                     | 15                                    | 7,021,961,730                      | 62                                    |
| <b>Unknown</b> | 42,374,783                                  | 0                                     | 0                                 | 0                                     | 42,374,783                         | 0                                     |
| <b>Total</b>   | 7,409,524,033                               | 66                                    | 1,932,359,143                     | 17                                    | 7,747,379,863                      | 69                                    |

**Supplementary Table 11. Summary of gene prediction of *A. fistulosum*.**

|                     | Gene set                     | Number  | Average transcript length (bp) | Average CDS length (bp) | Average exons per gene | Average exon length (bp) | Average intron length (bp) |
|---------------------|------------------------------|---------|--------------------------------|-------------------------|------------------------|--------------------------|----------------------------|
| <b>De novo</b>      | Augustus                     | 272,843 | 3,004.71                       | 555.83                  | 2.42                   | 229.7                    | 1,724.76                   |
|                     | GlimmerHMM                   | 671,869 | 15,283.96                      | 326.89                  | 2.72                   | 120.32                   | 8,712.55                   |
|                     | SNAP                         | 546,223 | 27,726.64                      | 562.93                  | 4.92                   | 114.43                   | 6,930.70                   |
|                     | Geneid                       | 695,655 | 3,971.93                       | 358.51                  | 2.6                    | 137.72                   | 2,253.83                   |
|                     | Genscan                      | 472,751 | 13,987.22                      | 589.45                  | 3.97                   | 148.54                   | 4,513.72                   |
| <b>Homolog</b>      | <i>Allium_sativum</i>        | 303,554 | 1,271.83                       | 550.69                  | 1.85                   | 297.33                   | 846.3                      |
|                     | <i>Ananas_comosus</i>        | 182,490 | 1,449.00                       | 639.29                  | 1.93                   | 331.92                   | 874.38                     |
|                     | <i>Apostasia_shenzhenica</i> | 351,899 | 1,874.93                       | 1,119.76                | 1.73                   | 647.24                   | 1,034.38                   |
|                     | <i>Arabidopsis_thaliana</i>  | 187,355 | 1,209.95                       | 600.08                  | 1.68                   | 357.53                   | 898.98                     |
|                     | <i>Musa_schizocarpa</i>      | 371,952 | 1,040.64                       | 558.86                  | 1.6                    | 348.29                   | 796.9                      |
|                     | <i>Oryza_sativa</i>          | 286,142 | 1,582.11                       | 920.34                  | 1.65                   | 557.25                   | 1,015.66                   |
|                     | <i>Zea_mays</i>              | 172,758 | 2,096.13                       | 1,131.14                | 2.02                   | 560.96                   | 949.39                     |
| <b>RNAseq</b>       | PASA                         | 83,977  | 5,702.02                       | 892.38                  | 4.29                   | 207.92                   | 1,461.01                   |
|                     | Cufflinks                    | 105,751 | 8,228.11                       | 1,834.73                | 4.5                    | 407.39                   | 1,824.81                   |
| <b>EVM</b>          |                              | 309,634 | 2,813.85                       | 548.57                  | 2.37                   | 231.34                   | 1,651.94                   |
| <b>Pasa-update*</b> |                              | 309,388 | 2,818.94                       | 548.81                  | 2.37                   | 231.75                   | 1,659.27                   |
| <b>Final set*</b>   |                              | 62,255  | 5,000.13                       | 820.11                  | 3.93                   | 208.47                   | 1,424.73                   |

**Supplementary Table 12. Characterization of genes of *A. fistulosum*.**

| <b>Species</b>               | <b>Number</b> | <b>Average transcript length (bp)</b> | <b>Average CDS length (bp)</b> | <b>Average exons per gene</b> | <b>Average exon length (bp)</b> | <b>Average intron length (bp)</b> |
|------------------------------|---------------|---------------------------------------|--------------------------------|-------------------------------|---------------------------------|-----------------------------------|
| <i>Allium_fistulosum</i>     | 62,255        | 5,000.13                              | 820.11                         | 3.93                          | 208.47                          | 1,424.73                          |
| <i>Allium_sativum</i>        | 57,561        | 5,202.81                              | 797.13                         | 3.64                          | 218.96                          | 1,668.52                          |
| <i>Musa_schizocarpa</i>      | 32,809        | 4,040.61                              | 1,126.84                       | 5.08                          | 222.02                          | 714.97                            |
| <i>Ananas_comosus</i>        | 27,024        | 4,341.80                              | 1,171.28                       | 5.53                          | 211.68                          | 699.41                            |
| <i>Arabidopsis_thaliana</i>  | 27,302        | 1,888.02                              | 1,230.07                       | 5.16                          | 238.38                          | 158.15                            |
| <i>Apostasia_shenzhenica</i> | 21,743        | 6,147.71                              | 1,099.28                       | 4.5                           | 244.13                          | 1,441.26                          |
| <i>Zea_mays</i>              | 39,188        | 3,472.15                              | 1,179.62                       | 4.93                          | 239.33                          | 583.5                             |
| <i>Oryza_sativa</i>          | 42,355        | 2,198.36                              | 992.95                         | 3.9                           | 254.47                          | 415.36                            |

**Supplementary Table 13. Summary of gene annotations using different databases.**

|                    | <b>Number</b> | <b>Percent (%)</b> |
|--------------------|---------------|--------------------|
| <b>Total</b>       | 62,255        | -                  |
| <b>Swissprot</b>   | 38,081        | 61.2               |
| <b>Nr</b>          | 50,431        | 81                 |
| <b>KEGG</b>        | 37,702        | 60.6               |
| <b>InterPro</b>    | 60,484        | 97.2               |
| <b>GO</b>          | 53,819        | 86.4               |
| <b>Pfam</b>        | 36,406        | 58.5               |
| <b>Annotated</b>   | 61,218        | 98.3               |
| <b>Unannotated</b> | 1,037         | 1.7                |

**Supplementary Table 14. Summary of non-coding RNA predication.**

| Type         |          | Copy (w*) | Average length (bp) | Total length (bp) | Percentage of genome (%) |
|--------------|----------|-----------|---------------------|-------------------|--------------------------|
| <b>miRNA</b> |          | 1,361     | 106.02              | 144,289           | 0.001278                 |
| <b>tRNA</b>  |          | 4,365     | 74.58               | 325,561           | 0.002883                 |
| <b>rRNA</b>  | rRNA     | 1,416     | 186.77              | 264,462           | 0.002342                 |
|              | 18S      | 219       | 581.37              | 127,319           | 0.001127                 |
|              | 28S      | 219       | 138.71              | 30,378            | 0.000269                 |
|              | 5.8S     | 94        | 96.54               | 9,075             | 0.00008                  |
|              | 5S       | 884       | 110.51              | 97,690            | 0.000865                 |
| <b>snRNA</b> | snRNA    | 1,723     | 114.33              | 196,988           | 0.001744                 |
|              | CD-box   | 992       | 105.95              | 105,107           | 0.000931                 |
|              | HACA-box | 203       | 134.83              | 27,370            | 0.000242                 |
|              | splicing | 526       | 121.81              | 64,073            | 0.000567                 |

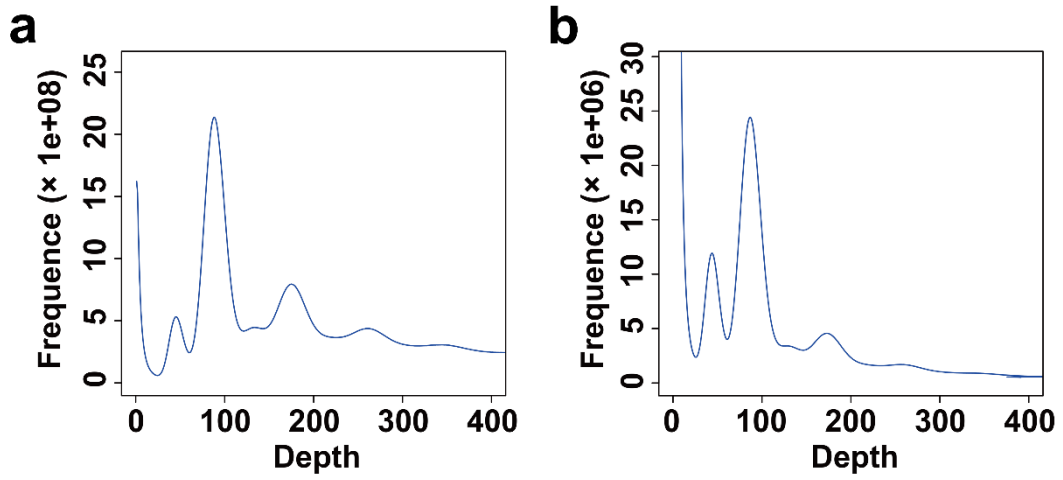

**Supplementary Fig. 1.  $k$ -mer based genome survey of *A. fistulosum*.** The frequency plots of  $k$ -mer number (a) and  $k$ -mer types (b), as well as depth given that  $k$ -mer ( $k=17$ ).



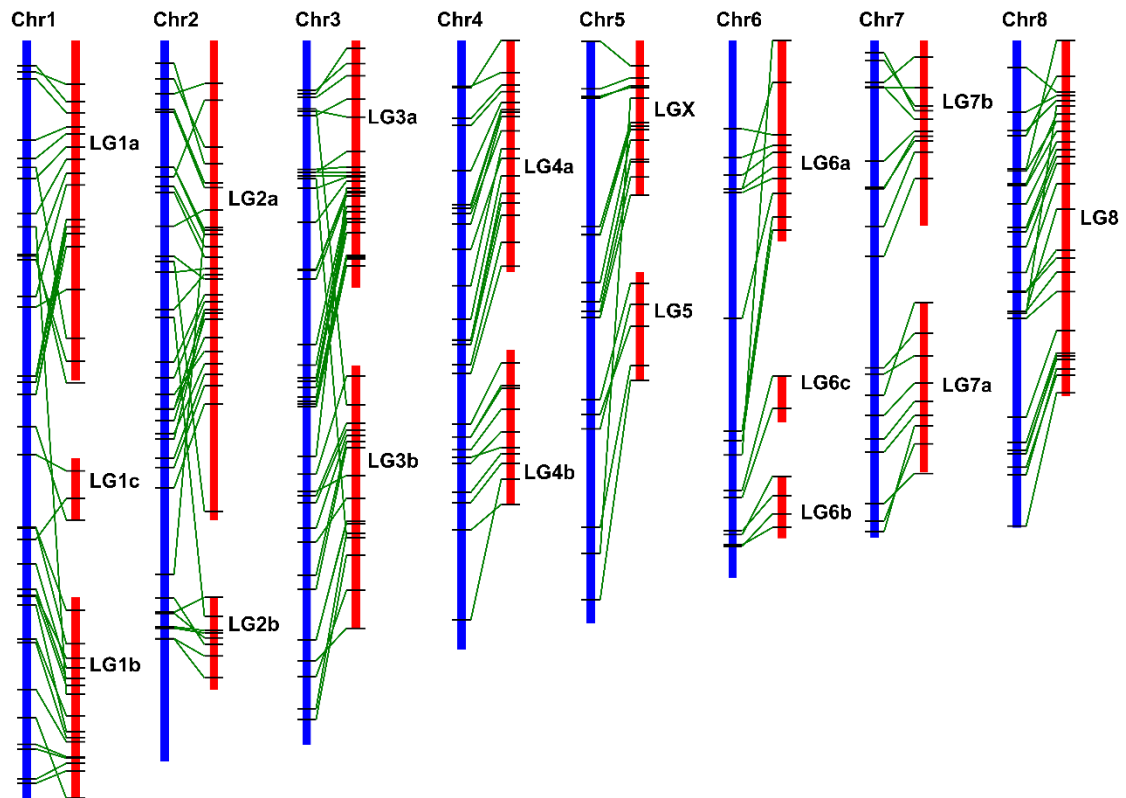

**Supplementary Fig. 2. The collinearity between genetic map and *A. fistulosum* genome assembly.** The blue columns indicated the chromosomes of assembled genomes, while the red columns indicated linkage groups (LG) of genetic map <sup>21</sup> and green lines indicated the collinearity relationships by SSR-markers anchoring.

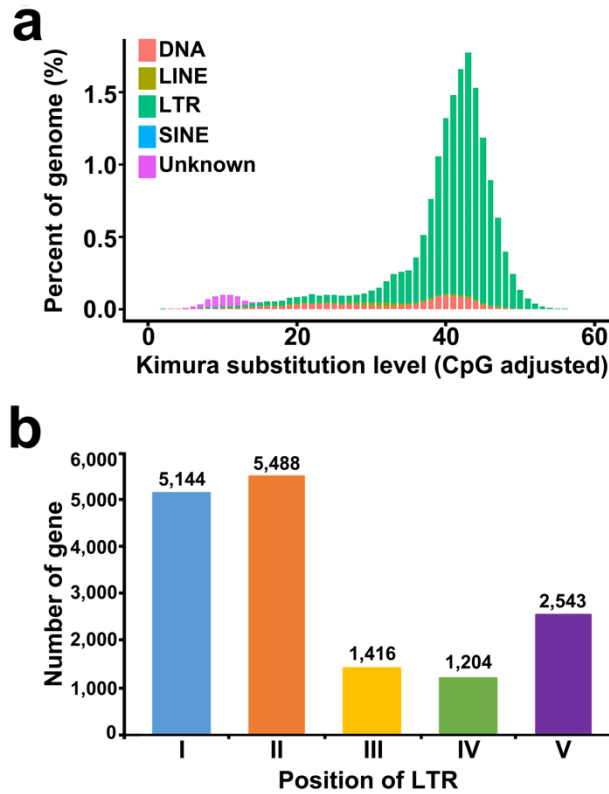

**Supplementary Fig. 3. LTR contributions to the genome enlargement of *A. fistulosum*.** **a**, Kimura substitution level (%) for each copy against its consensus sequence used as proxy for expansion history of the transposable elements. LINE, long interspersed nuclear elements; LTR, long terminal repeat; SINE, short interspersed nuclear element. **b**, Numbers of genes inserted by LTR retrotransposons. Blue column (I) indicates the number of genes whose promoter region was inserted by LTR; Orange column (II) indicates the number of genes whose 3'-terminus region was inserted by LTR; Yellow column (III) indicates the number of genes whose encoding region was inserted by LTR; Green column (IV) shows the number of genes that located within the LTR, and purple column (V) indicates the number of genes with sequences that partially overlap with the LTR.

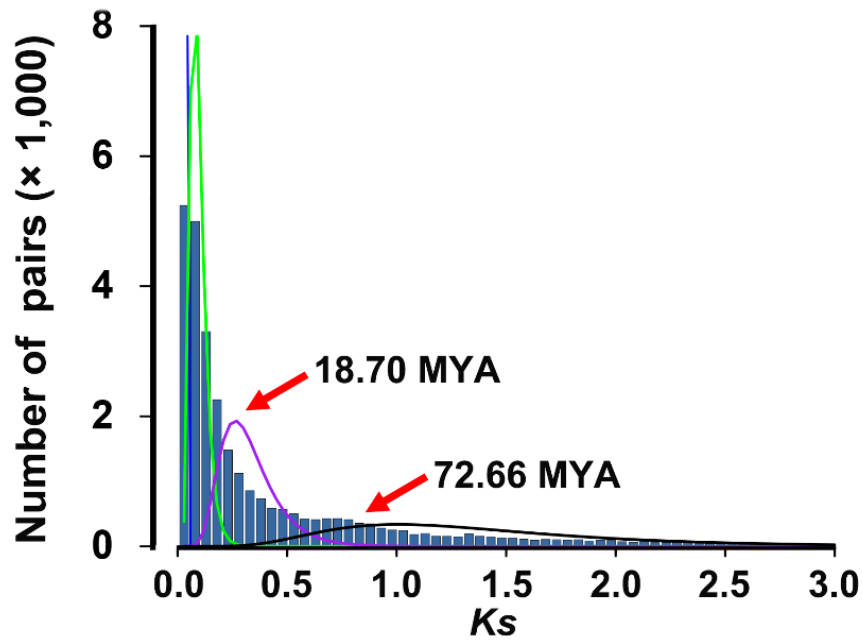

Supplementary Fig. 4. WGD events estimated from the  $K_s$  value of homologues pairs in syntenic regions of *A. fistulosum* and *A. stivium*. The histplot (blue bars) exhibited the distribution of the  $K_s$  values and the lines indicated the density estimation of the  $K_s$  values distributions.

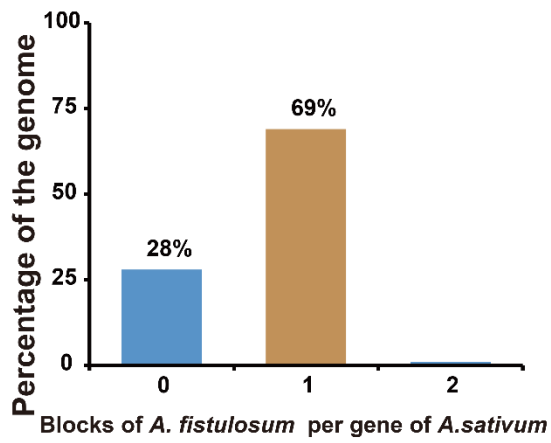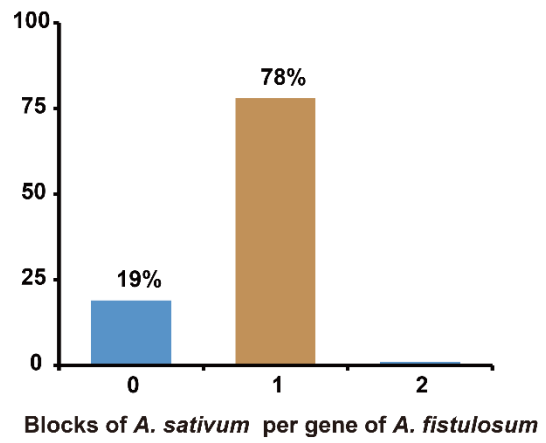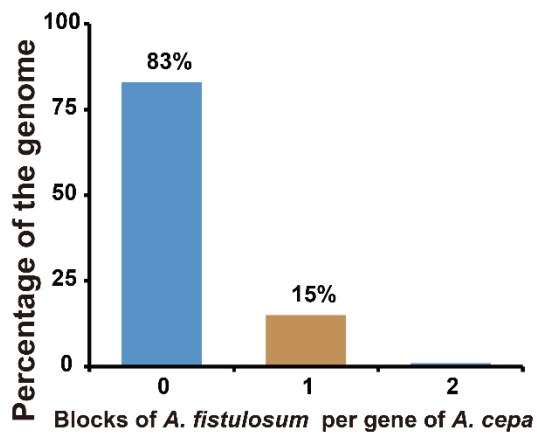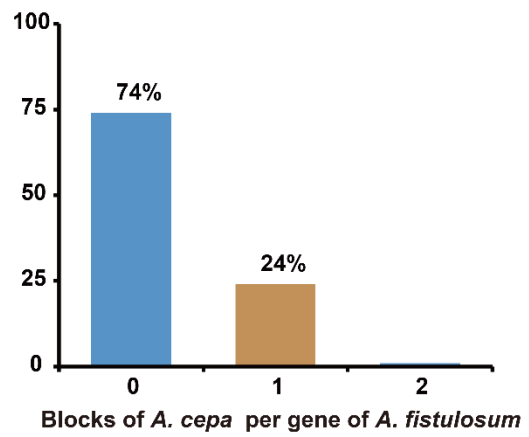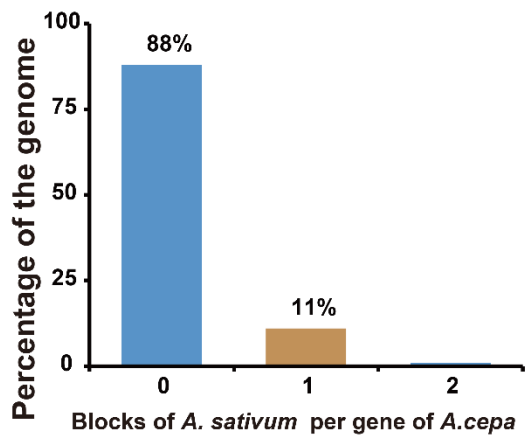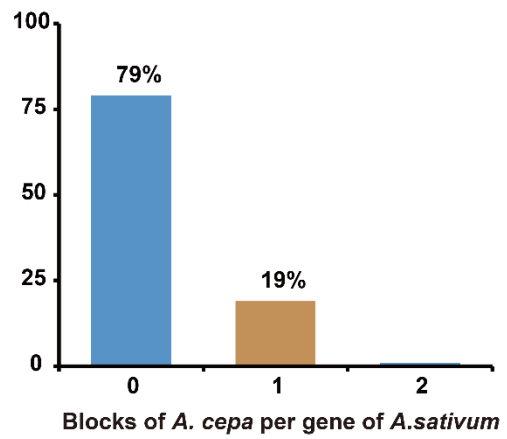

**Supplementary Fig. 5. Distribution of blocks of three *Allium* crops against each other.**

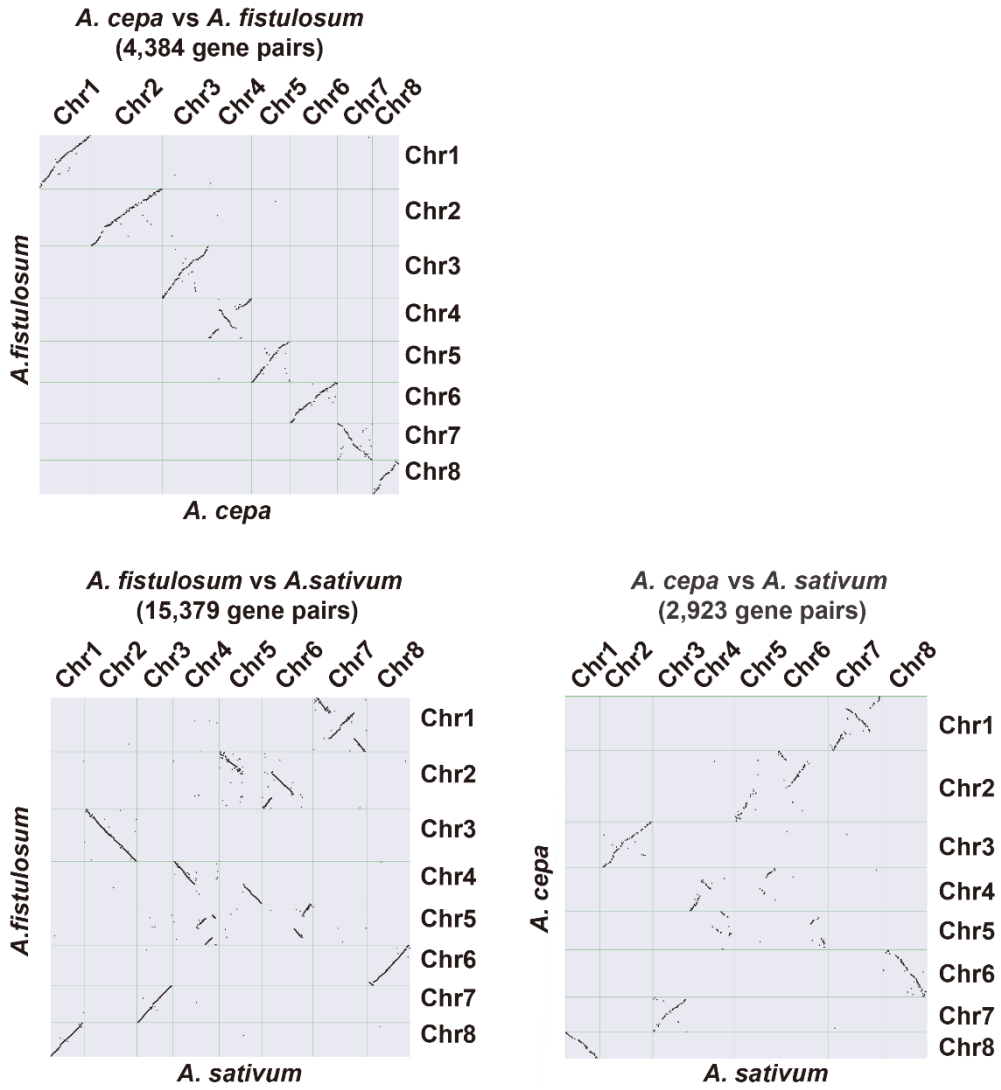

**Supplementary Fig. 6. High genomic collinearity among three *Allium* crops.**

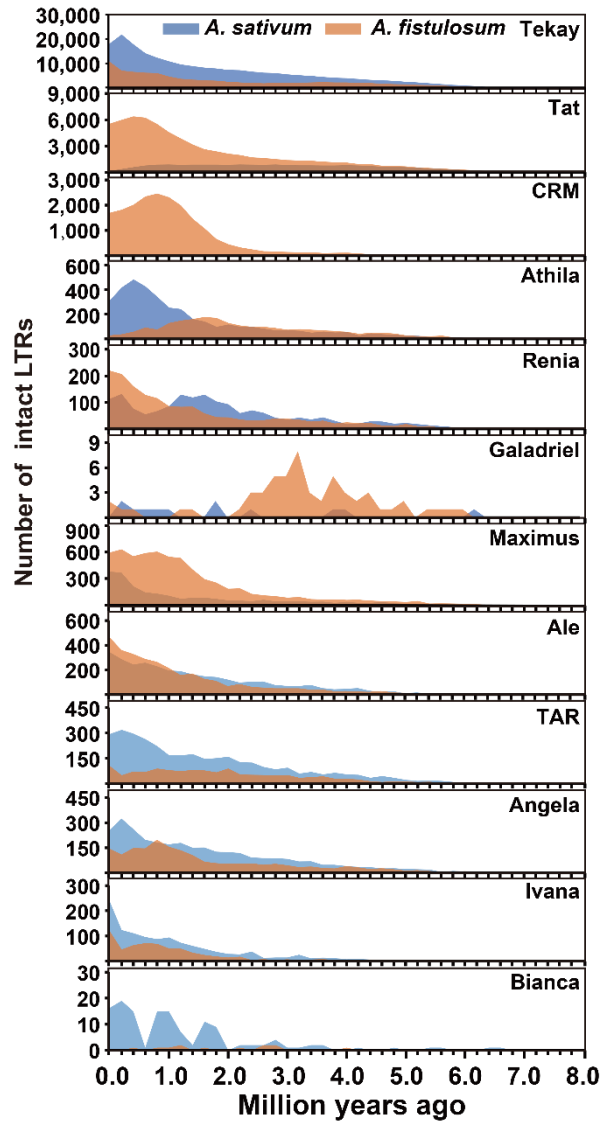

Supplementary Fig. 7. Average age of individual LTR families in *A. fistulosum* and *A. sativum*. Source data are provided as a Source Data file.

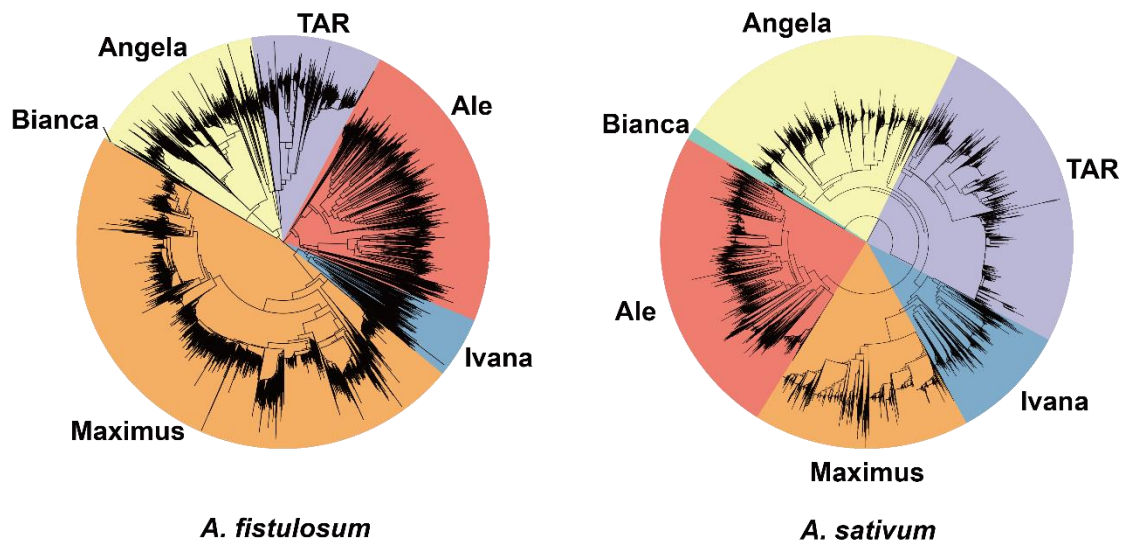

**Supplementary Fig. 8. Phylogenetic relationships of *Copia* LTR-retrotransposons identified in *A. fistulosum* and *A. sativum* genomes.**

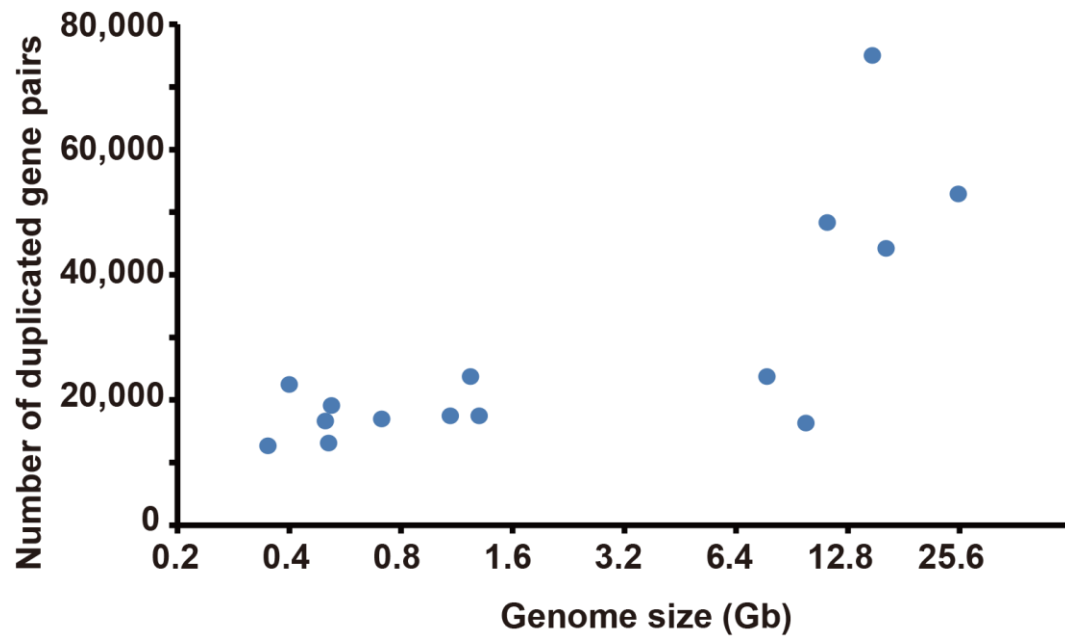

**Supplementary Fig. 9. DSD genes contribute to gene expansions.** Source data are provided as a Source Data file.



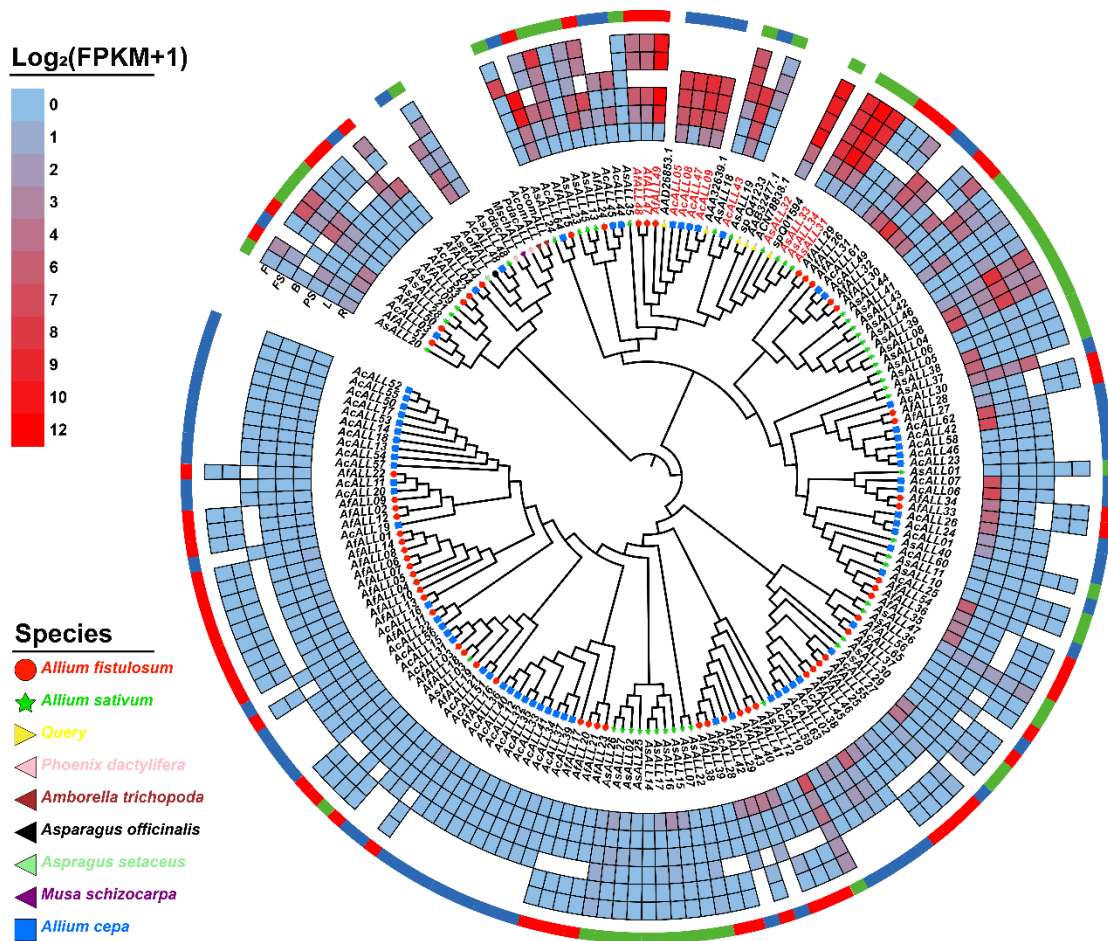

**Supplementary Fig. 10. Phylogenetic tree of ALLs from eight genomes.** The outer rings highlight the genes from *A. fistulosum* (red color), *A. cepa* (blue color), and *A. sativum* (green color), The heatmap exhibited the gene expressions in different tissues: R, roots; L, leaves; B, bulbs; PS, pseudo-stems; FS, floral stalks; F, flowers. Source data are provided as a Source Data file.

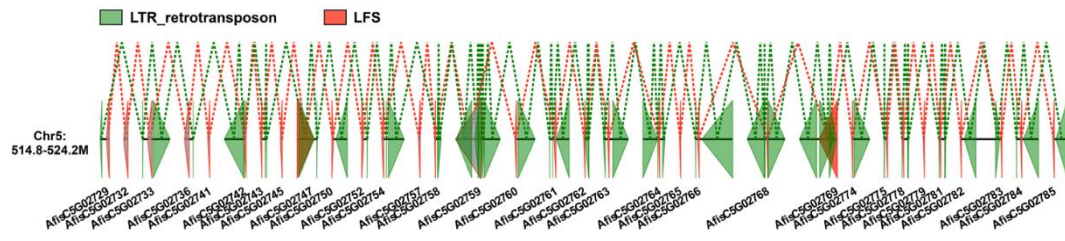

**Supplementary Fig. 11. Contributions of LTRs to the expansion of LFS genes.**

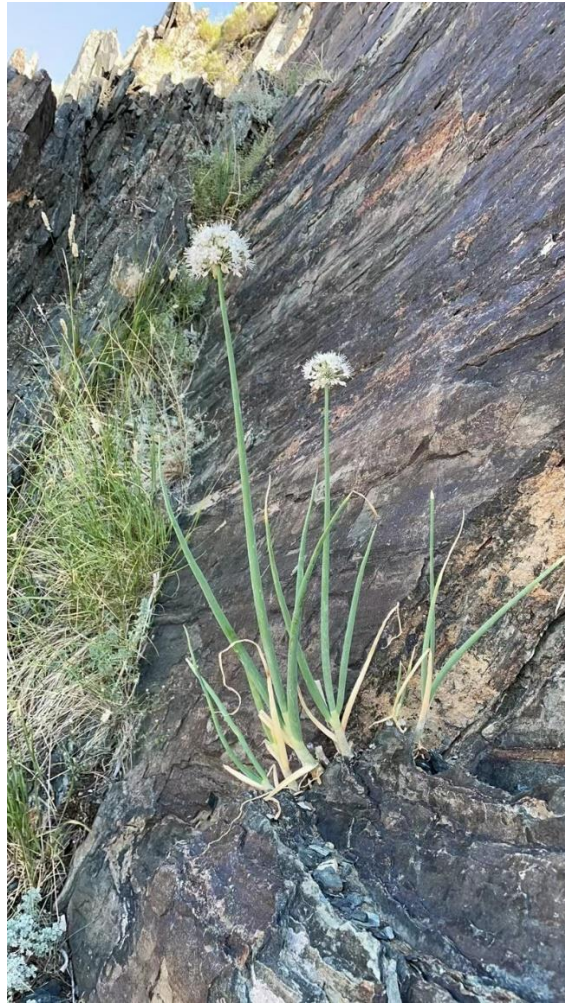

**Supplementary Fig. 12. The harsh habitat of *A. altaicum* in Altaicum moutain.** The picture was taken in Altaicum Moutain, Xinjiang, China (89.44E, 47.05N).

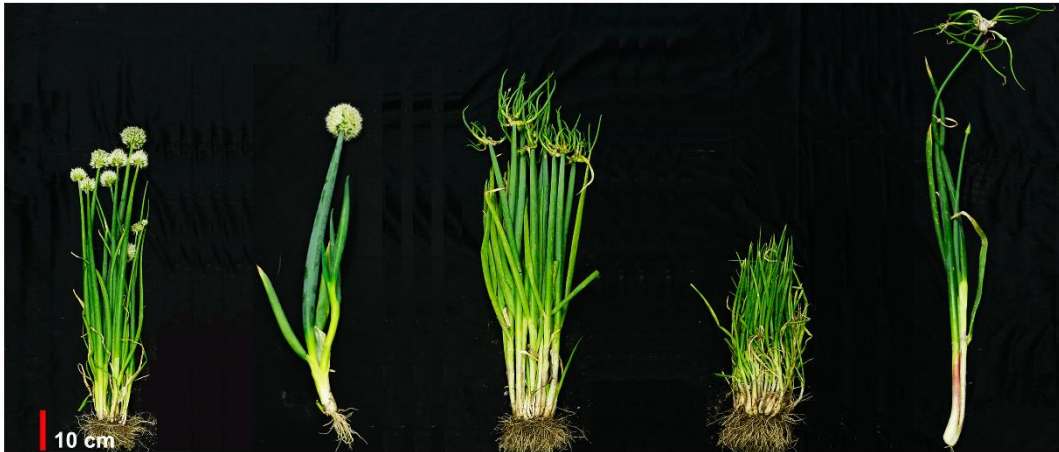

**Supplementary Fig. 13. Phenotypes of the partial re-sequenced *Allium* accessions.** From left to right, bunching onion, Welsh onion, storey onion, shallot, Chinese red onion.

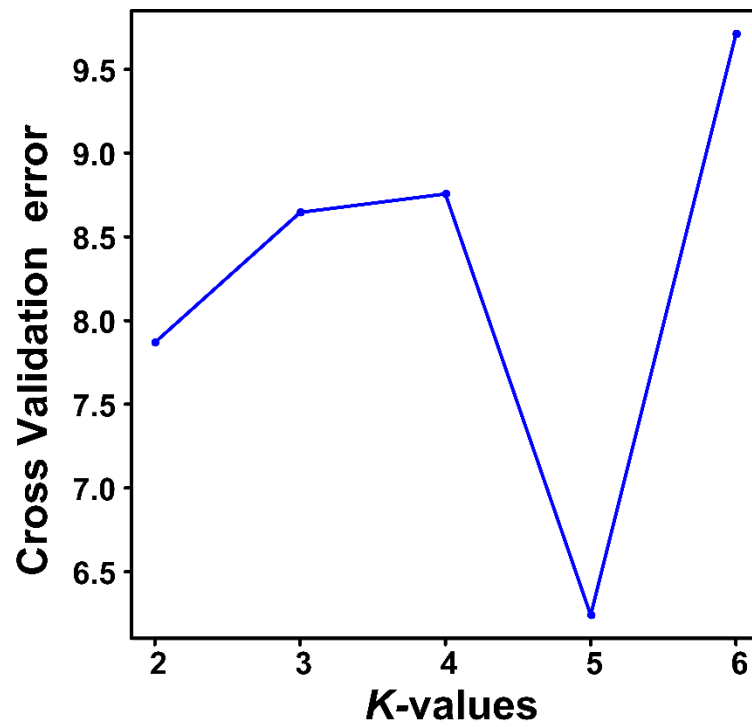

**Supplementary Fig. 14. Cross-validation plot demonstrating the effect of different *K*-values on the cross-validation error.** Source data are provided as a Source Data file.

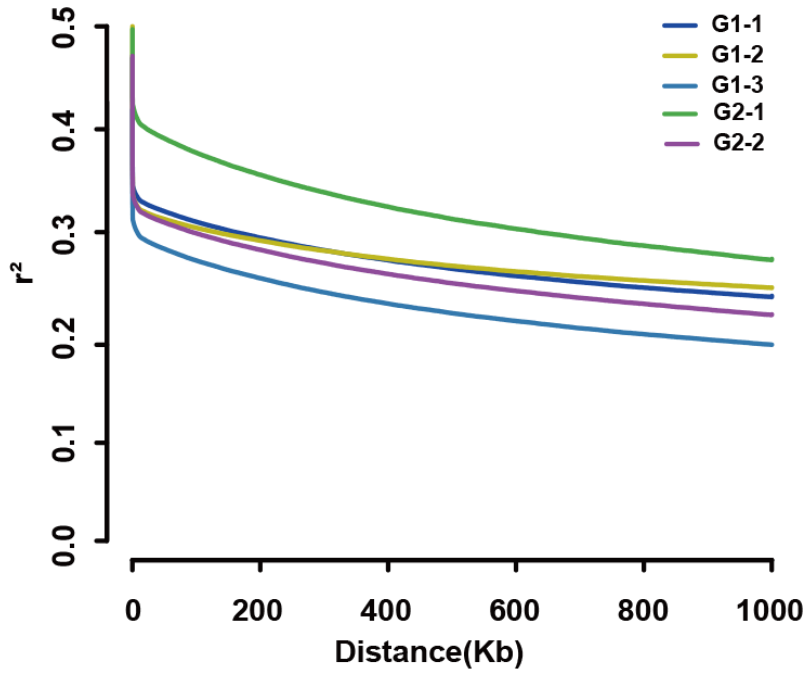

Supplementary Fig. 15. Genome-wide average LD decay estimated from five subgroups.

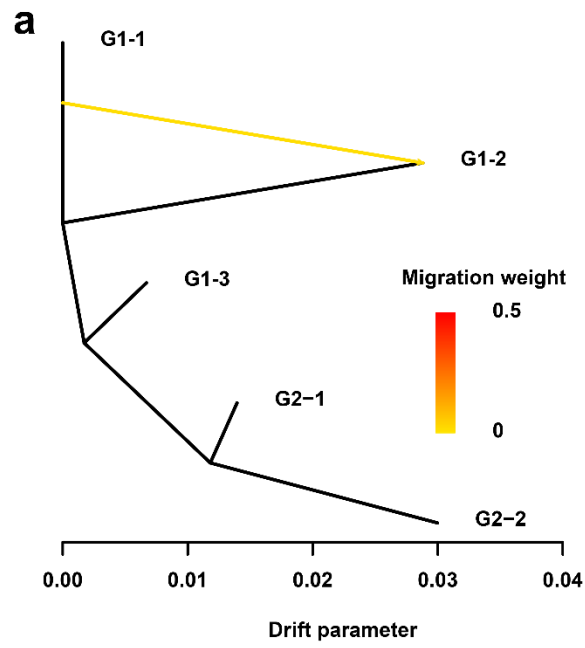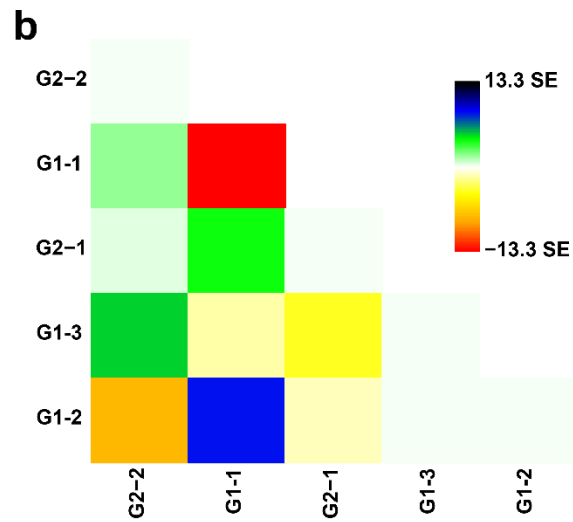

**Supplementary Fig. 16. Gene flows of different *A. fistulosum* subgroups. a,** Trees inferred by TreeMix. **b,** Residual fit, Plotted is the residual fit from the maximum likelihood tree.

|                               | The aliphatic pathway |      |           |           |                      |               |       |                 |         |        |        |      |      |         | The indolic and benzenic pathways |     |     |       |               |         |              | Co-substrate pathways |      |            |              |         |           |           |      |      |      |
|-------------------------------|-----------------------|------|-----------|-----------|----------------------|---------------|-------|-----------------|---------|--------|--------|------|------|---------|-----------------------------------|-----|-----|-------|---------------|---------|--------------|-----------------------|------|------------|--------------|---------|-----------|-----------|------|------|------|
|                               | BCAT4                 | BAT5 | MAM1;MAM3 | IPMI LSU1 | IPMI SSU2; IPMI SSU3 | IPMDH1;IPMDH3 | BCAT3 | CYP79F1;CYP79F2 | CYP83A1 | GSTF11 | GSTU20 | GGP1 | SUR1 | UGT74C1 | SOT17; SOT18                      | FMO | APO | GS-OH | CYP79A2;B2;B3 | CYP83B1 | GSTF9;GSTF10 | GGP1                  | SUR1 | 37-UGT74B1 | SOT17; SOT16 | CYP81F2 | APK1;APK2 | GSH1_PAD2 | CHY1 | AAO4 | BZO1 |
| <i>Arabidopsis thaliana</i>   | 6                     | 2    | 4         | 1         | 3                    | 3             | 6     | 2               | 2       | 2      | 10     | 5    | 8    | 4       | 3                                 | 13  | 2   | 16    | 4             | 2       | 2            | 5                     | 8    | 1          | 3            | 15      | 4         | 1         | 3    | 4    | 6    |
| <i>Allium sativum</i>         | 5                     | 1    | 2         | 2         | 0                    | 3             | 5     | 0               | 0       | 0      | 9      | 2    | 6    | 0       | 0                                 | 1   | 0   | 4     | 0             | 0       | 0            | 2                     | 6    | 0          | 0            | 3       | 2         | 4         | 5    | 2    | 2    |
| <i>Allium fistulosum</i>      | 6                     | 1    | 1         | 1         | 1                    | 1             | 6     | 0               | 0       | 0      | 6      | 2    | 6    | 0       | 0                                 | 3   | 0   | 7     | 0             | 0       | 0            | 2                     | 6    | 0          | 0            | 1       | 2         | 6         | 6    | 2    | 1    |
| <i>Allium cepa</i>            | 5                     | 1    | 1         | 1         | 1                    | 1             | 5     | 0               | 0       | 0      | 7      | 2    | 6    | 0       | 0                                 | 3   | 0   | 5     | 0             | 0       | 0            | 2                     | 6    | 0          | 0            | 1       | 3         | 5         | 5    | 2    | 1    |
| <i>Asparagus officinalis</i>  | 3                     | 1    | 0         | 1         | 0                    | 1             | 3     | 0               | 0       | 0      | 3      | 3    | 3    | 0       | 0                                 | 2   | 0   | 4     | 0             | 0       | 0            | 3                     | 3    | 0          | 0            | 0       | 2         | 1         | 3    | 0    | 0    |
| <i>Asparagus setaceus</i>     | 4                     | 1    | 3         | 4         | 1                    | 1             | 4     | 0               | 0       | 0      | 6      | 3    | 2    | 0       | 0                                 | 2   | 0   | 7     | 0             | 0       | 0            | 3                     | 2    | 0          | 0            | 1       | 2         | 1         | 3    | 2    | 2    |
| <i>Phalaenopsis equestris</i> | 3                     | 1    | 2         | 1         | 1                    | 1             | 3     | 0               | 0       | 0      | 8      | 1    | 0    | 0       | 0                                 | 3   | 0   | 4     | 0             | 0       | 0            | 1                     | 0    | 0          | 0            | 4       | 3         | 1         | 1    | 0    | 1    |
| <i>Dendrobium officinale</i>  | 6                     | 2    | 4         | 1         | 2                    | 1             | 6     | 0               | 0       | 0      | 5      | 1    | 1    | 0       | 0                                 | 2   | 0   | 2     | 0             | 0       | 0            | 1                     | 1    | 0          | 0            | 2       | 9         | 3         | 2    | 1    | 1    |
| <i>Apostasia shenzhenica</i>  | 3                     | 1    | 2         | 1         | 1                    | 1             | 3     | 0               | 0       | 0      | 2      | 1    | 0    | 0       | 0                                 | 1   | 0   | 1     | 0             | 0       | 0            | 1                     | 0    | 0          | 0            | 0       | 2         | 1         | 1    | 0    | 1    |
| <i>Ananas comosus</i>         | 3                     | 1    | 1         | 2         | 1                    | 1             | 3     | 0               | 0       | 0      | 3      | 2    | 1    | 0       | 0                                 | 1   | 0   | 7     | 0             | 0       | 0            | 2                     | 1    | 0          | 0            | 1       | 3         | 1         | 1    | 3    | 2    |
| <i>Oryza sativa</i>           | 5                     | 1    | 2         | 1         | 1                    | 1             | 5     | 0               | 0       | 0      | 0      | 1    | 5    | 2       | 0                                 | 1   | 0   | 3     | 1             | 0       | 0            | 1                     | 5    | 0          | 0            | 1       | 3         | 2         | 1    | 7    | 2    |
| <i>Phoenix dactylifera</i>    | 2                     | 1    | 1         | 2         | 2                    | 1             | 2     | 0               | 0       | 0      | 7      | 3    | 1    | 1       | 1                                 | 3   | 0   | 2     | 1             | 0       | 0            | 3                     | 1    | 0          | 1            | 11      | 4         | 2         | 1    | 2    | 6    |
| <i>Musa schizocarpa</i>       | 4                     | 1    | 1         | 1         | 1                    | 1             | 4     | 0               | 0       | 2      | 4      | 2    | 2    | 1       | 0                                 | 1   | 0   | 0     | 0             | 0       | 2            | 2                     | 2    | 0          | 0            | 1       | 4         | 2         | 3    | 1    | 4    |
| <i>Amborella trichopoda</i>   | 3                     | 1    | 1         | 2         | 1                    | 1             | 3     | 0               | 0       | 1      | 3      | 0    | 1    | 0       | 0                                 | 2   | 0   | 0     | 0             | 0       | 1            | 0                     | 1    | 0          | 0            | 0       | 1         | 2         | 2    | 5    | 2    |

Supplementary Fig. 17. The number of each glucosinolates-related gene in 14 genomes.



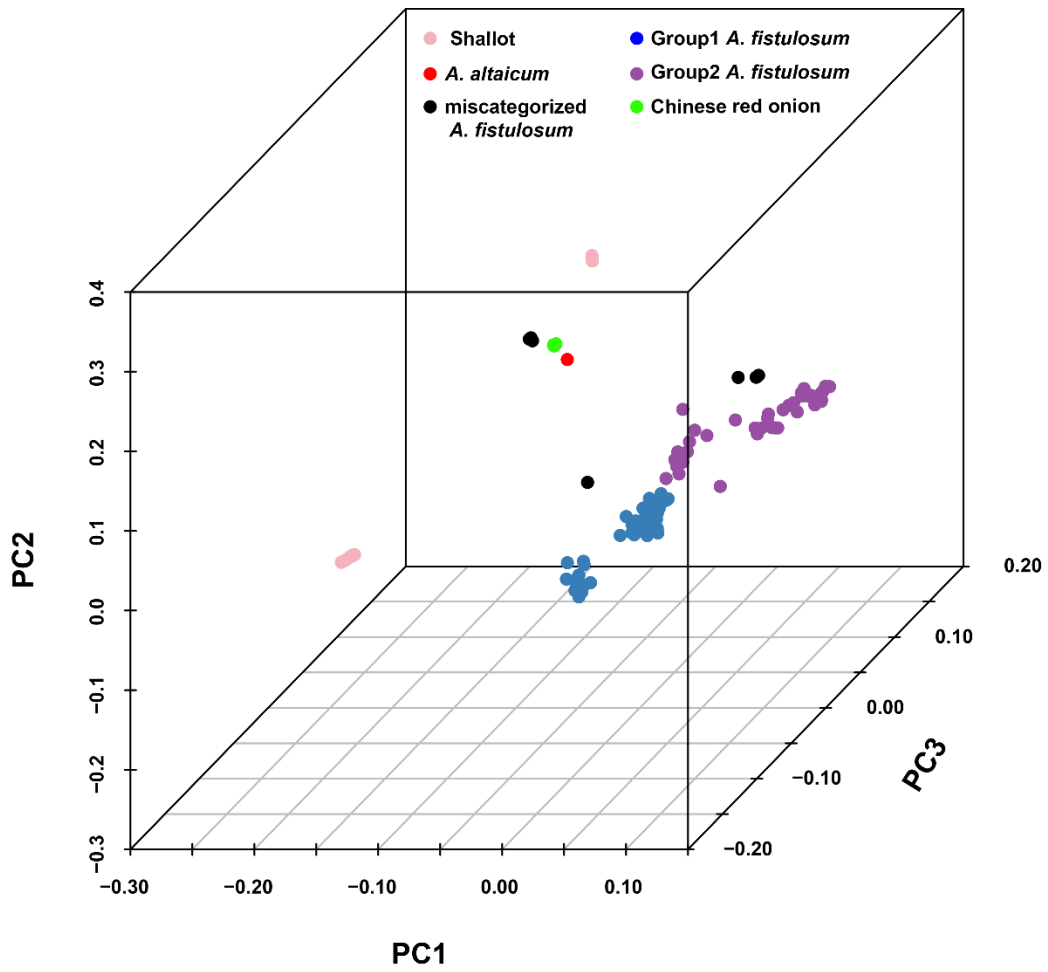

Supplementary Fig. 18. PCA analysis of 135 *Allium* accessions.
