# Supplementary material for: Chromosome-level genome assembly of bunching onion illuminates genome evolution and flavor formation in Allium crops
Source: PubMed Central journal article supplement (PMC9637129; doi:10.1038/s41467-022-34491-3), 2022-11-05
Supplement: 41467_2022_34491_MOESM2_ESM.pdf [file 41467_2022_34491_MOESM2_ESM.pdf]

### **Description of Additional Supplementary Files**

File Name: Supplementary Data 1

Description: Summary of the identified genes involved in sulfoxide biosynthesis in *Allium fistulosum*.

File Name: Supplementary Data 2

Description: Summary of the identified genes involved in sulfoxide biosynthesis in *Allium Cepa*.

File Name: Supplementary Data 3

Description: Summary of the identified genes involved in sulfoxide biosynthesis in *Allium Sativum*.

File Name: Supplementary Data 4

Description: Detailed information on accessions used for re-sequencing.
