# Supplementary material for: Chromosome-level genome assembly of bunching onion illuminates genome evolution and flavor formation in Allium crops
Source: PubMed Central journal article supplement (PMC9637129; doi:10.1038/s41467-022-34491-3), 2022-11-05
Supplement: 41467_2022_34491_MOESM7_ESM.pdf [file 41467_2022_34491_MOESM7_ESM.pdf]

## Reporting Summary

Nature Portfolio wishes to improve the reproducibility of the work that we publish. This form provides structure for consistency and transparency in reporting. For further information on Nature Portfolio policies, see our [Editorial Policies](#) and the [Editorial Policy Checklist](#).

### Statistics

For all statistical analyses, confirm that the following items are present in the figure legend, table legend, main text, or Methods section.

- |                                     |                                                                                                                                                                                                                                                                                                |
|-------------------------------------|------------------------------------------------------------------------------------------------------------------------------------------------------------------------------------------------------------------------------------------------------------------------------------------------|
| n/a                                 | Confirmed                                                                                                                                                                                                                                                                                      |
| <input type="checkbox"/>            | <input checked="" type="checkbox"/> The exact sample size ( $n$ ) for each experimental group/condition, given as a discrete number and unit of measurement                                                                                                                                    |
| <input type="checkbox"/>            | <input checked="" type="checkbox"/> A statement on whether measurements were taken from distinct samples or whether the same sample was measured repeatedly                                                                                                                                    |
| <input type="checkbox"/>            | <input checked="" type="checkbox"/> The statistical test(s) used AND whether they are one- or two-sided<br><i>Only common tests should be described solely by name; describe more complex techniques in the Methods section.</i>                                                               |
| <input checked="" type="checkbox"/> | <input type="checkbox"/> A description of all covariates tested                                                                                                                                                                                                                                |
| <input type="checkbox"/>            | <input checked="" type="checkbox"/> A description of any assumptions or corrections, such as tests of normality and adjustment for multiple comparisons                                                                                                                                        |
| <input type="checkbox"/>            | <input checked="" type="checkbox"/> A full description of the statistical parameters including central tendency (e.g. means) or other basic estimates (e.g. regression coefficient) AND variation (e.g. standard deviation) or associated estimates of uncertainty (e.g. confidence intervals) |
| <input type="checkbox"/>            | <input checked="" type="checkbox"/> For null hypothesis testing, the test statistic (e.g. $F$ , $t$ , $r$ ) with confidence intervals, effect sizes, degrees of freedom and $P$ value noted<br><i>Give <math>P</math> values as exact values whenever suitable.</i>                            |
| <input checked="" type="checkbox"/> | <input type="checkbox"/> For Bayesian analysis, information on the choice of priors and Markov chain Monte Carlo settings                                                                                                                                                                      |
| <input checked="" type="checkbox"/> | <input type="checkbox"/> For hierarchical and complex designs, identification of the appropriate level for tests and full reporting of outcomes                                                                                                                                                |
| <input checked="" type="checkbox"/> | <input type="checkbox"/> Estimates of effect sizes (e.g. Cohen's $d$ , Pearson's $r$ ), indicating how they were calculated                                                                                                                                                                    |

*Our web collection on [statistics for biologists](#) contains articles on many of the points above.*

### Software and code

Policy information about [availability of computer code](#)

Data collection Aglient Masshunter Quantitative for QQQ (v B.09.00/Build 9.0.647.0) was used for ACSOs measurements.

Data analysis CANU (v1.9); NextPolish (v1.2.4); Pilon (v1.2.2); Purge\_dups (v1.2.3); Bionano Solve (v3.5.1); ALLHiC (v0.9.8); BUSCO (v3.0.2); CEGMA (v2.5); BWA (v0.7.8); LTR\_retriever (v1.0.7); Mequery (v1.3); Chromonomer (v1.07); RepeatMasker (v4.07); RepeatModeler (v1.05); TRF (v4.09); Augustus (v3.2.3); Geneid (v1.4); Genescan (v1.0); GlimmerHMM (v3.0.2); SNAP (v2013.11.29); blast (v2.2.26); Tophat (v2.0.13); Cufflinks (v2.1.1); Trinity (v2.1.1); PASA (v2.2.0); EVIDENCEModeler (v1.1.1); InterProScan (v4.7); InterPro (v29.0); tRNAscan-SE (v1.4); INFERNAL (v1.1.2); FASTKs (<https://github.com/mrmckain/FASTKs>); MCLUST (<https://sites.stat.washington.edu/mclust/>); OrthoMCL (v1.4); MUSCLE (v3.8.31); RaxML (v8.2.12); CAFÉ (v4.2); TreeBest (v1.9.2); DupGen\_finder ([https://github.com/qiao-xin/DupGen\\_finder](https://github.com/qiao-xin/DupGen_finder)); HMMER (v3.3.1); samtools (v0.1.19); ANNOVAR (v20191024, <https://annovar.openbioinformatics.org/en/latest/user-guide/download/>); SNPhylo (v20180901); admixture (v1.23); VCFtools (v0.1.12b); PopLDdecay (v3.41); XP-CLR (v1.0); Python (v3.7.0); Perl (v5.30.0);

For manuscripts utilizing custom algorithms or software that are central to the research but not yet described in published literature, software must be made available to editors and reviewers. We strongly encourage code deposition in a community repository (e.g. GitHub). See the Nature Portfolio [guidelines for submitting code & software](#) for further information.

## Data

Policy information about [availability of data](#)

All manuscripts must include a [data availability statement](#). This statement should provide the following information, where applicable:

- Accession codes, unique identifiers, or web links for publicly available datasets
- A description of any restrictions on data availability
- For clinical datasets or third party data, please ensure that the statement adheres to our [policy](#)

All raw sequencing data generated in this study have been deposited to CNSA (<https://db.cngb.org/cnsa/>) under accession number "CNP0002276". The expression data of *A. sativum* was downloaded from NCBI GEO database under accession number "GEO:GSE145455".

## Human research participants

Policy information about [studies involving human research participants and Sex and Gender in Research](#).

|                             |                                                           |
|-----------------------------|-----------------------------------------------------------|
| Reporting on sex and gender | <input type="text" value="Not suitable for our study."/>  |
| Population characteristics  | <input type="text" value="Not suitable for our study.."/> |
| Recruitment                 | <input type="text" value="Not suitable for our study."/>  |
| Ethics oversight            | <input type="text" value="Not suitable for our study."/>  |

Note that full information on the approval of the study protocol must also be provided in the manuscript.

## Field-specific reporting

Please select the one below that is the best fit for your research. If you are not sure, read the appropriate sections before making your selection.

Life sciences       Behavioural & social sciences       Ecological, evolutionary & environmental sciences

For a reference copy of the document with all sections, see [nature.com/documents/nr-reporting-summary-flat.pdf](https://www.nature.com/documents/nr-reporting-summary-flat.pdf)

## Life sciences study design

All studies must disclose on these points even when the disclosure is negative.

|                 |                                                                                                                                                                                                                                                                                                                                                           |
|-----------------|-----------------------------------------------------------------------------------------------------------------------------------------------------------------------------------------------------------------------------------------------------------------------------------------------------------------------------------------------------------|
| Sample size     | <input type="text" value="We re-sequenced 135 diverse accessions, including A. fistulosum, shallots, Chinese red onions and one Allium altaicum. Ninety-six affirmed A. fistulosum accessions collected worldwide, including China, Japan, European, American and Central Asia countries, which covered the main bunching/welsh onion producing areas."/> |
| Data exclusions | <input type="text" value="A wild Allium accession was excluded because it's low illumina short-reads mapping rate (28.16%)."/>                                                                                                                                                                                                                            |
| Replication     | <input type="text" value="There were three or four biological replications for RNA sequencing and all the replications were successful and used in this study. And there are 3 biological replicates when quantified the isoalliin contents."/>                                                                                                           |
| Randomization   | <input type="text" value="For quantifying ACSOs contents, three samples was randomly selected in a single accession."/>                                                                                                                                                                                                                                   |
| Blinding        | <input type="text" value="Data collection and analysis were performed in a blinded manner."/>                                                                                                                                                                                                                                                             |

## Reporting for specific materials, systems and methods

We require information from authors about some types of materials, experimental systems and methods used in many studies. Here, indicate whether each material, system or method listed is relevant to your study. If you are not sure if a list item applies to your research, read the appropriate section before selecting a response.

## Materials & experimental systems

- |                                     |                                                        |
|-------------------------------------|--------------------------------------------------------|
| n/a                                 | Involvement in the study                               |
| <input checked="" type="checkbox"/> | <input type="checkbox"/> Antibodies                    |
| <input checked="" type="checkbox"/> | <input type="checkbox"/> Eukaryotic cell lines         |
| <input checked="" type="checkbox"/> | <input type="checkbox"/> Palaeontology and archaeology |
| <input checked="" type="checkbox"/> | <input type="checkbox"/> Animals and other organisms   |
| <input checked="" type="checkbox"/> | <input type="checkbox"/> Clinical data                 |
| <input checked="" type="checkbox"/> | <input type="checkbox"/> Dual use research of concern  |

## Methods

- |                                     |                                                 |
|-------------------------------------|-------------------------------------------------|
| n/a                                 | Involvement in the study                        |
| <input checked="" type="checkbox"/> | <input type="checkbox"/> ChIP-seq               |
| <input checked="" type="checkbox"/> | <input type="checkbox"/> Flow cytometry         |
| <input checked="" type="checkbox"/> | <input type="checkbox"/> MRI-based neuroimaging |
